# Supplementary material for: Invasive neurophysiology and whole brain connectomics for neural decoding in patients with brain implants
Source: Research Square preprint supplement (doi:10.21203/rs.3.rs-3212709/v1), 2023-09-20
Supplement: Supplementary file 1 [file bff8e0952e9227cb807ae45d.xlsx]

## Sheet: Sheet2
	Patient ID	Sex	Age*	Group	Location (lead 1)	Location (lead 2)	Months postop	ILAE	Seizure Reduction	Number Recordings	Ictal recording duration [min]	Total recording duration [min]
	RNS-01	F	22.7	Hippo-campus	Left Hippo-campus	Right Hippo-campus	11	5	0	676	131.38	754.89
	RNS-02	F	34.3	Neocortex	Left superior occipital	Left inferior occipital	3	3	0.95	131	6.48	182.36
	RNS-03	F	34.5	Neocortex	Right premotor area	Right primary motor area	11	3	0.95	545	38.97	747.49
	RNS-04	F	39.2	Migrational Dysplasia	Left heterotopia	Right heterotopia	10	3	na	1059	258.63	956.8
	RNS-05	M	21.8	Migrational Dysplasia	Right heterotopia	Right heterotopia	23	5	0	590	132.22	575.25
	RNS-06	F	46.4	Migrational Dysplasia	Left heterotopia	Right heterotopia	26	4	0.5	356	65.16	431.73
	RNS-07	F	37.6	Hippo-campus	Left Hippo-campus	Right Hippocampus	20	5	0	1089	175.9	1349.83
	RNS-08	F	41.4	Neocortex	Basal temporal (depth)	Temporo occipital (strip)	35	5	0.33	1058	195.21	1215.61
	RNS-09	F	39.5	Hippo-campus	Left Hippo-campus	Right Hippocampus	7	6	0	228	23.46	301.04
	*at implantation
